# Supplementary material for: Enhancement of crystalline quality and solar-blind photodetection characteristics of ε-Ga2O3 films by introducing Zn impurity
Source: Royal Society of Chemistry journal article supplement (doi:10.1039/d3tc03599a), 2023-10-25
Supplement: d3tc03599a1.pdf [file d3tc03599a1.pdf]

## Electronic Supplementary Information

### Enhancement of crystalline quality and solar-blind photodetection characteristic of $\epsilon$ -Ga<sub>2</sub>O<sub>3</sub> Film by introducing Zn impurity

Received 00th January 20xx,  
Accepted 00th January 20xx

Xuan Sun,<sup>ab</sup> Kewei Liu,<sup>\*ab</sup> Xing Chen,<sup>ab</sup> Yongxue Zhu,<sup>a</sup> Zhen Cheng,<sup>a</sup> Jialin Yang,<sup>a</sup> Binghui Li,<sup>ab</sup> Lei Liu,<sup>ab</sup> and Dezhen Shen<sup>\*ab</sup>

DOI: 10.1039/x0xx00000x

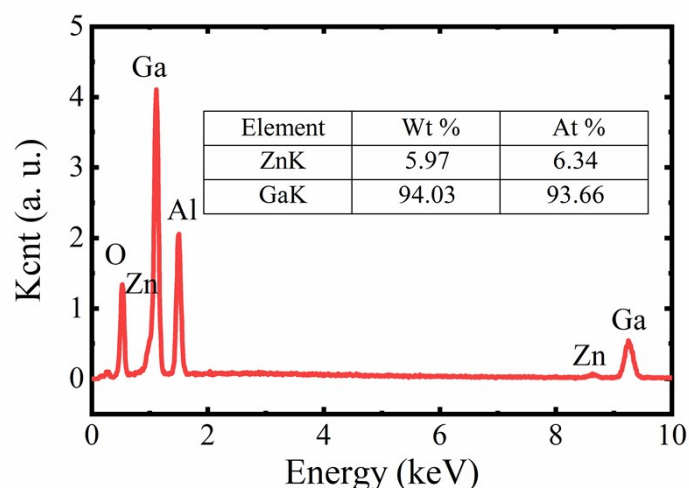

**Figure S1** EDS spectrum of  $\epsilon$ -Ga<sub>2</sub>O<sub>3</sub>:Zn.

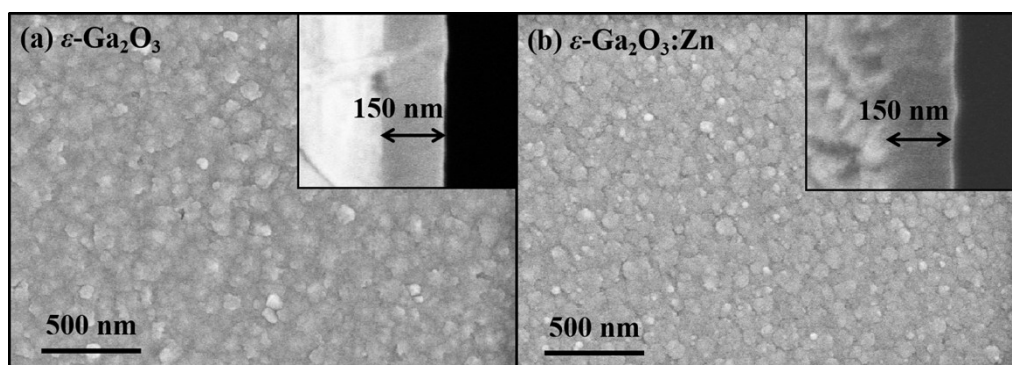

**Figure S2** SEM images of (a) pure  $\epsilon$ -Ga<sub>2</sub>O<sub>3</sub> and (b)  $\epsilon$ -Ga<sub>2</sub>O<sub>3</sub>:Zn.

<sup>a</sup> State Key Laboratory of Luminescence and Applications, Changchun Institute of Optics, Fine Mechanics and Physics, Chinese Academy of Sciences, No.3888 Dongnanhu Road, Changchun, 130033, People's Republic of China. E-mail: [liukw@ciomp.ac.cn](mailto:liukw@ciomp.ac.cn); [shendz@ciomp.ac.cn](mailto:shendz@ciomp.ac.cn)

<sup>b</sup> Center of Materials Science and Optoelectronics Engineering, University of the Chinese Academy of Sciences, Beijing 100049, People's Republic of China

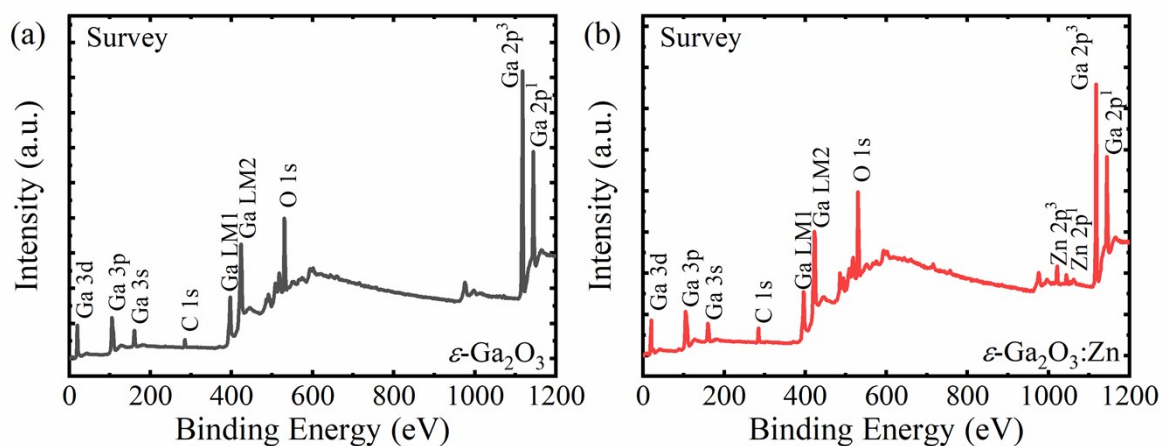

**Figure S3** XPS survey spectra of (a) pure  $\epsilon$ -Ga<sub>2</sub>O<sub>3</sub> and (b)  $\epsilon$ -Ga<sub>2</sub>O<sub>3</sub>:Zn.

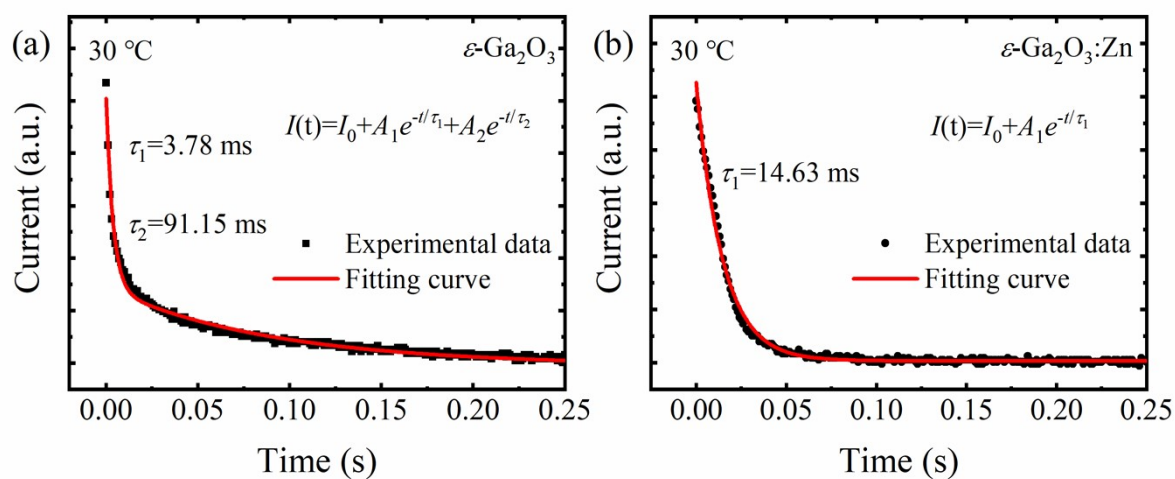

**Figure S4** Typical decay curves of (a)  $\epsilon$ -Ga<sub>2</sub>O<sub>3</sub> and (b) Zn-doped  $\epsilon$ -Ga<sub>2</sub>O<sub>3</sub> detectors at 30 °C.
